# Applying the SEIR Model in Forecasting

## The COVID-19 Trend in Malaysia: A Preliminary Study

Aidalina Mahmud<sup>1\*</sup>, Poh Ying Lim<sup>1</sup>

<sup>1</sup> Department of Community Health, Faculty of Medicine and Health Sciences, Universiti Putra Malaysia, Selangor, Malaysia

\*Corresponding author

E-mail: [aidalina@upm.edu.my](mailto:aidalina@upm.edu.my)

Both authors contributed equally to this work.

### Author summary

Dr. Aidalina Mahmud is a Public Health Specialist and a medical lecturer in the Department of Community Health, Universiti Putra Malaysia. Dr. Lim Poh Ying is a Biostatistician and is a senior lecturer in the Department of Community Health, Universiti Putra Malaysia.

30        **Abstract**

31

32        On March 18, 2020 the Malaysian government implemented a 14-day Movement  
33        Control Order (MCO) as part of the mitigation plan in controlling the COVID-19  
34        epidemic in the country. The MCO aims to limit the contact rates among the  
35        population and hence prevent the surge of infected individuals. However, the trend  
36        of the epidemic before and after the MCO was not apparent. By applying the  
37        Susceptible, Exposed, Infectious and Removed (SEIR) mathematical model, we aimed  
38        to forecast the trend of COVID-19 epidemic in Malaysia using data from March 17  
39        to 27, 2020. Based on several predetermined assumptions, the results of the analyses  
40        showed that after the implementation of the 14-day MCO from March 18 to 31,  
41        2020, it is forecasted that the epidemic in Malaysia will peak approximately in the  
42        end of April 2020 and will subside by about the first week of July 2020. The MCO  
43        will “flatten the epidemic curve” but will prolong the duration of the epidemic.  
44        Decision to extend the duration of the MCO should depend on the consideration of  
45        socioeconomic factors as well.

46

47        Keywords: SEIR model, COVID-19, forecasting, trend, Malaysia

48

49

50

51

52

53

54

55

56 **Introduction** 1

57  
58 In Malaysia, the COVID-19 pandemic progressed from the alert phase when the  
59 nation was made aware of the epidemic in China in late 2019, to containment phase  
60 when the disease arrived in Malaysia in mid-January 2020. Malaysia announced its  
61 first Covid-19 cases on January 25 involving three China tourists who had come into  
62 Malaysia from Singapore on January 23[1]. Up until the first week of February, the  
63 positive cases were all epidemiologically linked to someone from China of who has been to  
64 China. Two individuals from the humanitarian mission to Hubei were also tested positive  
65 for COVID-19 [2]. By February 15, there were 23 cases, and then no new confirmed  
66 COVID-19 cases were reported until February 28 [3]. The group of cases up to  
67 February 15 represented the first wave of cases in Malaysia.

68  
69 Subsequently increasing number of symptomatic individuals with presented to the  
70 healthcare facilities and were tested for the novel coronavirus. Those who tested  
71 positive were subsequently isolated and treated. A second wave of cases began on  
72 February 28, and since then the cumulative number of people affected by the  
73 coronavirus had risen to more than 1,000.

74  
75 Containment measures at this stage were isolation and treatment of cases in  
76 dedicated COVID-19 hospitals coupled with active case detection among close  
77 contacts of the cases. In addition, individuals with history of travel to China or  
78 having close contacts with a confirmed COVID-19 case were classified as suspected  
79 cases and put under quarantine for two weeks. Other measures of containment

80 included thermal and health screening of people at all international entry points and  
81 travel restriction advice to China.

82  
83 By the first week of March 2020, the number of cases began to steadily rise. During  
84 this time, the Ministry of Health Malaysia received information from the Brunei  
85 counterpart about a man who was diagnosed with COVID-19 in that country. This  
86 individual claimed to have had participated in a religious mass gathering at a mosque  
87 in the outskirts of capital city Kuala Lumpur from 27 February to 1 March 2020.  
88 The gathering was attended by approximately 16,000 people from several  
89 neighboring countries [4].

90  
91 This news raised the alarm in Malaysia. Active case detection among the  
92 participants of that mass gathering was immediately commenced, in an  
93 unprecedented exercise involving thousands of people. It was later noted that these  
94 participants had already spread the disease to their family members and close  
95 acquaintances [5]. As a result, the number of cases began to sharply rise.

96  
97 At this stage, containment measures were enhanced. As it was no longer feasible to  
98 identify all infectious individuals and their contacts in the attempt to slow the spread  
99 of disease, the government applied community-wide containment measures. These  
100 interventions ranged from measures to encourage personal responsibility to identify  
101 disease and to increase social distancing among community members including  
102 cancellation of public gatherings. Despite these measures, the number of confirmed

103 cases continued to rise. The government then went into mitigation phase.

104

105 In mitigation phase, the country was placed under country-wide 14-day quarantine  
106 from March 18 to March 31, under the Movement Control Order (MCO) [6]. The  
107 MCO included firstly general prohibition of mass movements and gatherings across the  
108 country including religious, sports, social and cultural activities. All premises must be  
109 closed except for supermarkets, public markets, convenience stores and convenience  
110 stores selling everyday necessities. Secondly, those who have just returned from  
111 overseas, they are required to undergo a health check and to do a quarantine (or self-  
112 quarantine) for 14 days; third, restrictions on the entry of all tourists and foreign visitors  
113 into the country; fourth, closure of all kindergartens, schools and pre-university  
114 institutions; fifth, the closure of all public and private higher education institutions; and  
115 sixth, the closure of all government and private premises except those involved in  
116 essential services (such as water, electricity, energy, telecommunications, postal,  
117 transportation and food supply).

118

119 During this phase, allocation of resources to the hospitals were enhanced: more  
120 intensive care unit beds were prepared, more human resources were deployed, and  
121 more personal protective equipment were acquired [7,8].

122

123 After having taken such unprecedented actions in controlling the epidemic, the  
124 forecast of the trend of this epidemic is crucial. The government needs to know if  
125 these actions had worked, and if so, to what extent. Forecast of the course of this

126 epidemic is required in order to plan further on the actions that need to be taken.

127

128 One of the ways to forecast the trend of an epidemic is by using mathematical  
129 modelling, using either the deterministic or stochastic approaches. Deterministic model  
130 is based on the average characteristic of the population parameters under study, whereas  
131 stochastic model takes into account the randomness of elements of the population.  
132 Although stochastic model is more accurate in evaluating real-life epidemic propagation  
133 it is not entirely reproducible. Moreover, when the population is large enough these  
134 kinds of randomness neutralise each other and then a simpler deterministic model turns  
135 to be good enough to use. Simulation study based on deterministic compartmental model  
136 is most applied in epidemiology. Of the many deterministic models, the Susceptible-  
137 Exposed-Infectious-Removed (SEIR) models are often implemented when studying the  
138 spread of infectious diseases that possess significant incubation periods. In the case of  
139 COVID-19 several studies from China have also used this SEIR model [9,10, 11, 12].

140

141 Therefore, the aim of this paper is to forecast the progression of COVID-19  
142 epidemic in Malaysia, before and after the Movement Control Order (MCO), using  
143 the SEIR model.

144

## 145 **Materials and methods**

9

### 146 **Data**

147

148 The data for this forecasting analysis was obtained from publicly available database and

149 websites; mainly those of the Ministry of Health Malaysia and Department of Statistics  
150 Malaysia. Data included in this analysis are those from March 17, 2020 until March 27,  
151 2020. This period was the first 10 days of the MCO exercise; and it was chosen because it  
152 coincided with the second wave of the epidemic in Malaysia. Two analyses were carried out,  
153 the first estimated the epidemic trend of COVID-19 for Malaysia before the MCO was  
154 implemented, while the second forecasted the trend after the implementation of MCO.

155

### 156 **SEIR Model**

157

158 A deterministic SEIR model based on the clinical progression of the disease, epidemiological  
159 status of the individuals, and intervention measures was proposed. The mathematical model  
160 used was the Susceptible, Exposed, Infectious and Removed (SEIR) model, as shown in  
161 Fig.1.

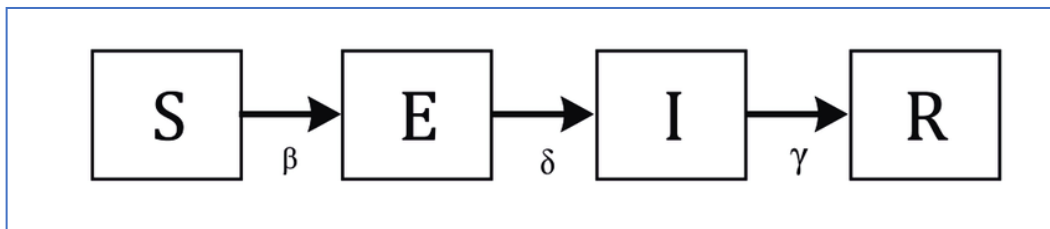

162

163 **Fig 1. The Susceptible (S), Exposed (E), Infectious (I) and Removed (R) (SEIR) model**

164

165 The Susceptible, Exposed, Infectious and Removed are states in which an individual  
166 progresses in sequence. The infectious rate,  $\beta$ , controls the rate of spread which represents  
167 the probability of transmitting disease between a susceptible and an infectious individual.  
168 The incubation rate,  $\delta$ , is the rate of latent individuals becoming infectious (average duration  
169 of incubation is  $1/\delta$ ). Recovery rate,  $\gamma = 1/D$ , is determined by the average duration,  $D$ , of

170 infection.

171

172 The quantity  $S$  denotes the number of individuals those are susceptible to the disease but not  
173 infected at time  $t$ . This is the total number of population who are at risk. The quantity  $E$   
174 denotes the number of individuals those are exposed to the virus or infected but not yet  
175 infectious. This is the total number of population who came in contact with a disease person  
176 and carrying the infective agent. The quantity  $I$  denotes the number of infected individuals  
177 who can spread the disease through contact with susceptible. This is the number of exposed  
178 population developing sign and symptoms and infectious to others. The quantity  $R$  denotes  
179 the number of individuals those have successfully gained immunity from the disease and /  
180 or removed by death. This is the number of infected populations recovering from the disease  
181 and no longer infectious to others. The parameter  $\beta$  is transmission rate of disease from  
182 susceptible to exposed. Sigma ( $\sigma$ ) refers to the Infection rate, while  $\gamma$  is the average durations  
183 infectiousness. The infectious diseases spread from an infected individual to other  
184 susceptible individuals in the surroundings. The governing equations describing the  
185 evolution and dynamics of SEIR model can be described by a set of ordinary differential  
186 equations as follows [13].

187

$$188 \quad \frac{dS}{dt} = \frac{-\beta SI}{N}$$

$$189 \quad \frac{dE}{dt} = \frac{-\beta SI}{N} - \sigma E$$

$$190 \quad \frac{dI}{dt} = \sigma E - \gamma I$$



191 
$$\frac{dR}{dt} = \gamma I$$

192

193 **Data analysis**

194

195 Data included in this analysis are those from March 17, 2020 until March 27, 2020. It  
196 was chosen because it coincided with the second wave of the epidemic in Malaysia. The  
197 MCO also began at about the same time, which was on March 18.

198

199 In this model, the state susceptible (S) is the adult population aged 15 years and more, in  
200 Malaysia. This age range was chosen because so far reports have shown that COVID-19 has  
201 affected children and adolescents less than adults. Population in 2019 was approximately 32,  
202 000,000 and of which, population in 2019 who were  $\geq 15$  years old was 76.7%. The exposed  
203 (E) is the number of people screened as of March 28 (35,516 people) minus the number of  
204 people screened as of March 17 (9,799 people). The infected (I) is the number of confirmed  
205 cases from March 17 until March 27, while the removed (R) is number of individuals those  
206 have successfully gained immunity from the disease and / or removed by death from March  
207 17 until March 27. Table 1 summarizes the values and references of each of the states.

208

209

**Table 1. Different parameters in the SEIR model and their values**

| Parameters      | Value used for this analysis                                | Source |
|-----------------|-------------------------------------------------------------|--------|
| Susceptible (S) | $S = 25,000,000$<br><br>S rate<br>$= 25,000,000/32,000,000$ | [14]   |

|                    |                                                           |          |
|--------------------|-----------------------------------------------------------|----------|
|                    | = 0.78125                                                 |          |
| Exposed (E)        | E = 25, 717<br>E rate<br>= 25, 717/32,000,000<br>= 0.0008 | [15, 16] |
| Infected (I)       | I = 1608<br>I rate<br>= 1608/32,000,000<br>= 0.00005      | [15,17]  |
| Recovered/died (R) | R= 216<br>R rate<br>= 216/32,000,000<br>= 0.000006        | [17]     |

210

211

212

213

214

215

216

217

218

219

The main difference between the pre-MCO period and the MCO period is the reduced contact among individuals within the MCO period, compared to that in the before the MCO period. Other public health prevention and control measures remained the same.

In the context of the SEIR model, the MCO would affect the contact rates between the positive COVID-19 patients and the people around them, through the parameter Exposed (E)'s co-efficient which is beta ( $\beta$ ). Beta value during the pre-MCO period used in this analysis was 6.47, based on the study in China [18]. The beta value of 6.47 was higher than other published estimates for example a value of 2.2 [19]. Such a high

220 reproduction number was consistent with the opinion that the virus has gone through at  
221 least three to four generations of transmission in the period covered by their study  
222 [18,20] WHO, 2020). This stance was also held in this current study based on the  
223 findings by the Ministry of Health, that by the time the MCO was implemented there  
224 were at least 4 generations of infected individuals originating from the individuals who  
225 attended the mass gathering in late February 2020. Therefore, the first analysis using the  
226 SEIR model used the beta value of 6.47 to forecast the epidemic before the MCO in  
227 Malaysia was implemented.

228  
229 We used the same dataset to forecast the epidemic trend *after* the implementation of the  
230 MCO. As mentioned, after the implementation of MCO the rate of contact between the  
231 infected and the exposed was anticipated to be lesser than the before the MCO period.  
232 The reduced rate of contact would result in a lower value for beta. A study estimated  
233 that the median daily reproduction number ( $R_t$ ) in Wuhan declined from 2.35 (95% CI  
234 1.15–4.77) one week before travel restrictions were introduced on January 23, 2020, to  
235 1.05 (0.41–2.39) one week after [21]. This was a 55% decline in the value of beta. In  
236 Malaysia, due to the limited movement among the population of Malaysia and the  
237 nationwide travel restrictions imposed through the MCO, we forecast that the epidemic  
238 after the MCO would also result in a reduction of the beta. Assuming that the reduction  
239 in beta was 55% from the without MCO, as in the abovementioned study [21] we set the  
240 beta value at 2.91, in the second analysis using the SEIR model.

241  
242 For the coefficient of latency ( $\sigma$ ) is 1/ period of latency. Because the latency period is yet

243 not known for COVID-19, the value for incubation period was used. The incubation  
 244 period was assumed to be Erlang distributed with mean 5.2 days (SD 3.7) (Li et al, 2020).  
 245 The coefficient of migration rate ( $\gamma$ ), is 1/ average recovery time. The average duration  
 246 between the confirmation of diagnosis to date of removal (died/discharged) for Malaysia was  
 247 9.7 ( $\pm$  5.3) days, based on sample of 58 patients from the start of the epidemic until  
 248 26.3.2020. However, patients may have had symptoms prior to presentation at the hospital  
 249 or prior to the diagnosis confirmed. According to a study the median time from date of onset  
 250 of symptoms to date of confirmation was 4.8 ( $\pm$  3.0) days [22]. Therefore, the total average  
 251 recovery time was the sum of 9.7 and 4.8 days which was equal to 14.5 days. Table 2 shows  
 252 different coefficient in the SEIR model and their values.

253  
 254 **Table 2. Different coefficient in the SEIR model and their values**

255

| Coefficients                       | Value used for this analysis                                                                                                                                                                                     | Source                                                              |
|------------------------------------|------------------------------------------------------------------------------------------------------------------------------------------------------------------------------------------------------------------|---------------------------------------------------------------------|
| $\beta$ = coefficient of infection | $\beta = \beta_0 * k$<br>$\beta$ = coefficient of infection rate (R)<br>$\beta_0$ = probability of infection per exposure (R <sub>0</sub> )<br>k = frequency of exposure<br>$\beta^1 = 6.47$<br>$\beta^2 = 1.05$ | Tang et al, 2020 <sup>1</sup><br>Kucharski et al, 2020 <sup>2</sup> |
| $\sigma$ = coefficient of latency  | $T_e$ = average latency<br>= 5.2 days<br>$\sigma = 1/ T_e$                                                                                                                                                       | Li et al, 2020                                                      |

|                                          |                                                                                                          |                     |
|------------------------------------------|----------------------------------------------------------------------------------------------------------|---------------------|
|                                          | $= 1/5.2$<br>$= 0.19$                                                                                    |                     |
| $\gamma$ = coefficient of migration rate | $\gamma = 1/ T_i$<br>$T_i$ = average recovery time<br>$T_i = 14.5$ days<br>$\gamma = 1/ T_i$<br>$= 0.07$ | Kraemer et al, 2020 |

256

257 In both analyses before the MCO and after MCO, it was assumed that the other  
 258 parameters and their co-efficient would remain the same. The Susceptibility (S) rate  
 259 depends on the population size with is massive, the Infection (I) rate would be the same  
 260 it depends on the incubation period of the virus and Removal (R) rate would also remain  
 261 the same as it depends on the recovery time. Because during the time of this analysis  
 262 there was no introduction of any new drugs, the average recovery period would remain  
 263 the same. Based on the available data and the above assumptions, an R software, R-3.6.3  
 264 with package “deSolve” was used to create the SEIR model [23].

265

## 266 **Results**

17

267 At present there are two waves of the COVID-19 epidemic in Malaysia as shown in  
 268 Fig.2. The first wave was in early February, while the larger second wave began in late  
 269 February.

270

271

272

273  
274  
275  
276  
277  
278  
279  
280  
281  
282  
283  
284  
285  
286  
287  
288  
289  
290  
291  
292  
293  
294  
295  
296

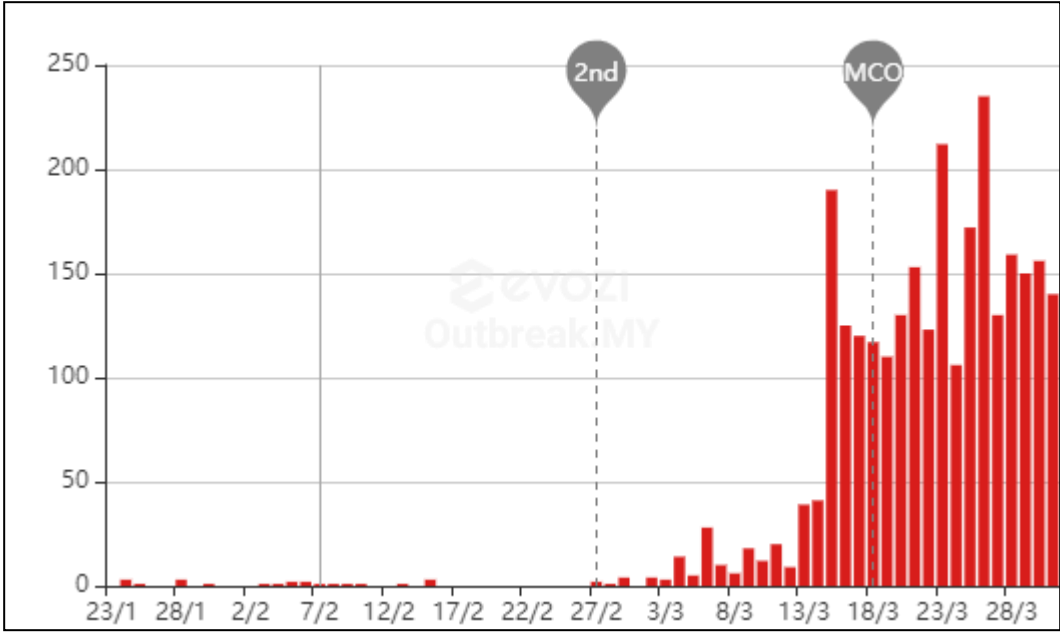

**Fig. 2 Distribution of confirmed new cases of COVID-19 in Malaysia**

Source: [24]

Using the data and parameters as detailed in Table 1 in the SEIR model, the following graph was produced (Fig. 3). The graph shows that without the MCO, the number of new cases of infection would have peaked at day 18 after March 18 and would gradually subside and becomes plateaued at day 80 before finally ends by day 94 after March 18. At its peak, the infection could affect up to about 43% of the population.

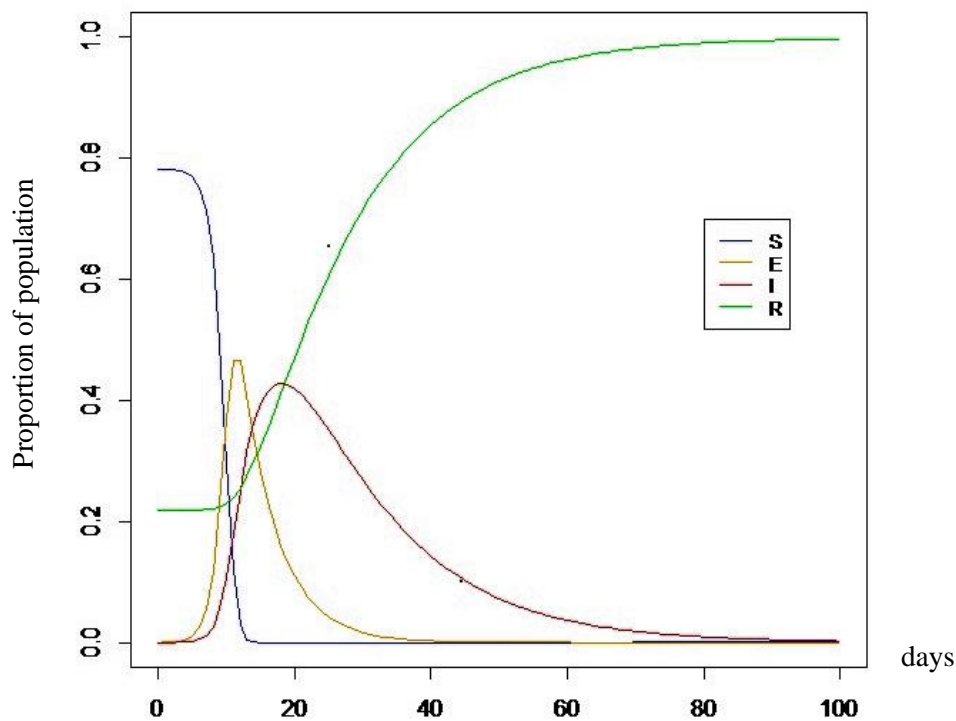

297  
298  
299  
300  
301  
302  
303  
304  
305  
306  
307  
308  
309  
310

**Fig. 3 Forecast of the COVID-19 epidemic in Malaysia without MCO  
(beta = 6.47)**

The above analysis was repeated using a smaller beta value to address the lesser contact rates among the susceptible population due to the implementation of the 14-day MCO. The result is shown in Fig. 4. The graph shows that with the implementation of MCO for 14 days, the number of new cases of infection would have peaked at about day 25 after March 31 and would gradually subside and becomes plateaued at day 90 after March 31 before finally ends by day 100 after March 31. At its peak, the infection could affect up to about 40% of the population.

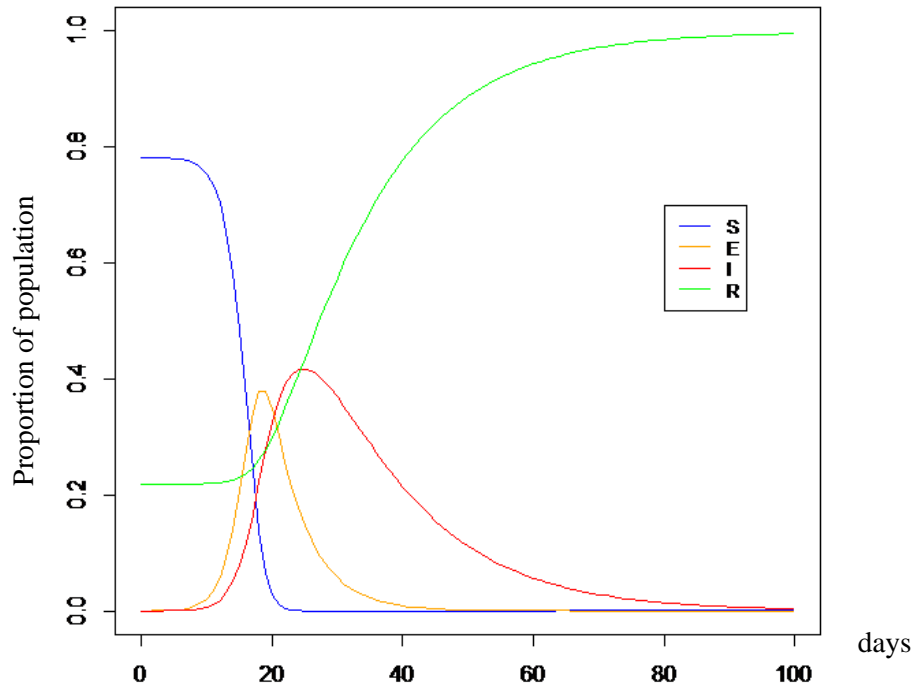

311

312

313 **Fig. 4 Forecast of the COVID-19 epidemic in Malaysia after 14-day MCO**

314 **(beta = 2.91)**

315

316 After the implementation of the 14-day MCO, with a correspondingly lower beta value,

317 we predict that there is a lesser peak in the number of people being infected but a slightly

318 longer duration for the infection to subside. Summary of differences in parameters

319 between pre-MCO and after MCO is shown in Table 3.

320

321

322

323

324

325



326 **Table 3. Summary of differences in parameters between pre-MCO and after MCO**

| Parameters     | Pre-MCO               | After 14-day MCO       |
|----------------|-----------------------|------------------------|
| Peak infection | Day 18 (9 April 2020) | Day 25 (25 April 2020) |
| Plateau        | Day 80 (6 June 2020)  | Day 90 (29 June 2020)  |
| Subside        | Day 94 (20 June 2020) | Day 100 (9 July 2020)  |

327

## 328 **Discussion**

4

329 The rationale of limiting movement of the population in an epidemic situation is to  
330 minimize the transmission of the infectious agent. Minimizing the transmission of the  
331 infectious agent would be favorable to the health system as it will reduce or avoid the  
332 surge of patients coming to health care facilities for treatment. The surge capacity of  
333 hospitals is often limited and the more than usual number of patients could result in  
334 substandard care due to limited disposable resources. Therefore, efforts like locking  
335 down a city or an entire province like what China did recently; or Movement Control  
336 Order (MCO) implemented in Malaysia, will to an extent, result in “flattening the  
337 epidemic curve”.

338

339 The COVID-19 curve is steep curve, in which the virus spreads exponentially (that is,  
340 case counts keep doubling at a consistent rate), and the total number of cases rise steeply  
341 to its peak within a few weeks. Infection curves like that of the COVID-19 with a steep  
342 rise also have a steep fall. A flatter curve, on the other hand, assumes the same number  
343 of people ultimately get infected, but over a longer period. A slower infection rate means  
344 a less stressed health care system. So, although the health authorities and governments

345 alike are chanting the “let’s flatten the curve” mantra, one often neglected fact is that  
346 flattening the curve would also mean longer duration of the epidemic. As shown in our  
347 analysis, there should be reductions in the number of infected cases at the epidemic’s  
348 peak after the MCO effort, but the duration it takes for the epidemic to subside would  
349 be longer.

350  
351 If the 14-day MCO in Malaysia was not implemented, based on the data analyzed and  
352 the assumptions used in the analysis, the peak of the infection period would be about 20  
353 days after March 18, which was about the first week of April. At the peak period, the  
354 proportion of the population affected would be about 43% of susceptible individuals in  
355 the country. The duration of which new cases would continue to be recorded was  
356 predicted to be about 80 days from March 18 (approximately June 6, 2020). It is  
357 predicted that the epidemic would subside by about June 26, 2020.

358  
359 With the implementation of the 14-day MCO in Malaysia beginning March 18 until  
360 March 31, the peak of the infection period would be about 30 days the end of the MCO  
361 (approximately April 30, 2020). At the peak period, the proportion of the population  
362 affected would be about 40% of susceptible individuals in the country. The duration of  
363 which new cases would continue to be recorded was predicted to be about 90 days from  
364 March 31 (approximately June 29, 2020). It is predicted that the epidemic would subside  
365 by about July 9, 2020. This forecast was again based on the data used and the  
366 assumptions that were used.

367

368 Whether or not the government chooses to prolong the duration of the MCO depends on  
369 whether it is best to suffer excruciating pain of an epidemic for a short period of time,  
370 or a milder but lingering pain of an epidemic for a longer period of time.

371  
372 Longer duration of an epidemic could be detrimental to the economy. As an example,  
373 the lockdown in Hubei recently resulted in severe economic impact. Numerous firms  
374 evacuated their expat workers from the city and temporarily halted business activities,  
375 and among the industries that would be negatively impacted were retail, tourism, and  
376 hospitality sectors [25]. When China reopened its essential businesses on February 3,  
377 2020, the markets dropped sharply in value [26]. The economic and labour crisis created  
378 by the Coronavirus Disease 2019 (COVID-19) pandemic could increase global  
379 unemployment by almost 25 million, according to a new assessment by the International  
380 Labour Organization (ILO). While at the national level, due to COVID-19 pandemic  
381 this year, Malaysia's unemployment rate is expected to shoot up to 4% this year, from  
382 3.3% in 2019. At the individual level, being unable to work and earn an income could  
383 lead the individual and his family into financial catastrophe. While at the government  
384 level, having to create economic stimulation packages to cushion the effect of the poor  
385 economy could cost a country, billions and even trillions of dollars. Even more  
386 challenging is that the stimulus package needs to be created in the circumstance when  
387 the government itself is not making any money.

388  
389 In addition to the economic consequences, studies have shown that longer duration of  
390 movement restriction could result in negative psychological effects among all ages. A

391 recent systematic review of literature on the psychological impact of quarantine in the  
392 general population showed that stressors included longer quarantine duration, infection  
393 fears, frustration, boredom, inadequate supplies, inadequate information, financial loss,  
394 and stigma; all of which could lead to depression and anxiety [27]. While for children  
395 and adolescents, stressors such as prolonged duration, fears of infection, frustration and  
396 boredom, inadequate information, lack of in-person contact with classmates, friends,  
397 and teachers, lack of personal space at home, and family financial loss can have more  
398 profound negative effects [27]. A study showed that the mean posttraumatic stress scores  
399 were four times higher in children who had been quarantined than in those who were  
400 not quarantined [28].

401  
402 As for front-line health care workers, they too are also negatively affected. Scientific  
403 evidence on this is abundant. For example, a study in Japan found that during the H1N1  
404 pandemic in 2009, workers with a high risk of infection felt more anxious and more  
405 exhausted [29]. Studies in China in 2003 during the SARS epidemic found that  
406 approximately 10% of hospital employees experienced high levels of posttraumatic  
407 stress (PTS) symptoms and that health care workers reported fatigue, poor sleep, worry  
408 about health, and fear of social contact, despite their confidence in infection-control  
409 measures; also have chronic stress and higher levels of depression and anxiety [30,31].

410  
411 The limitations of this forecast lie mainly in the assumptions used and because the data  
412 used were from publicly available platforms. We used the data available on the day the  
413 data was announced. As there was a backlog of specimens to be analyzed of about 1,000

414 during the time of this analysis, we could not be certain whether the data on the new  
415 number of cases announced was entirely same-day data or it included data from  
416 specimens taken several days prior to the announcement. Apart from the number of new  
417 cases for each day, the nature of this data affected another parameter, namely the  
418 recovery period. For the recovery period, we considered the date of removal (discharged  
419 or death) and subtract that from the date of confirmation of diagnosis, instead of the  
420 actual dates of the start of illness to the day of discharge or death. This calculation may  
421 slightly under-estimate the duration of illness. Also, we did not consider the more  
422 frequent active case detection activities which have just been started during the  
423 production of this article. We also assumed that the laboratory capacity remains the same  
424 in the next few months, as when this analysis was conducted. Nonetheless, the results  
425 of this model could give an idea of the possible time span of the epidemic, until more  
426 detailed data is available. Additionally, the model could demonstrate that flattening the  
427 epidemic curve prolongs the duration of epidemic.

428

## 429 **Conclusion**

430

431 After the implementation of the 14-day MCO from 18 March 2020 to March 31, it is  
432 forecasted that the epidemic in Malaysia will peak approximately in the end of April 2020  
433 and will subside by about the first week of July 2020. Restricting movement of the  
434 population will reduce contact among individuals and hence would lessen the transmission  
435 and infection rates. This will “flatten the epidemiological curve” but will prolong the  
436 duration of the epidemic. Decision to extend the duration of the MCO should depend on the

437 consideration of socioeconomic factors as well.

438

439

440 **Supporting information**

441 Files metadata

## References

1. Ministry of Health Malaysia. Kenyataan Akhbar Ketua Pengarah Kesihatan Malaysia Pada 24 Januari 2020 - Tindakan Kkm Bagi Pengesanan Kontak (Contact Tracing) Kepada Kes Pertama Positif Novel Coronavirus Di Negara Singapura Pada 24 Januari 2020. In: Ministry of Health Malaysia Official Website. 2020 Jan 24 [Cited 2020 March 26]. Available from:  
[http://www.moh.gov.my/index.php/database\\_stores/store\\_view\\_page/21/1300](http://www.moh.gov.my/index.php/database_stores/store_view_page/21/1300)
2. Ministry of Health Malaysia. Press Statement Ministry Of Health Malaysia: Updates On The 2019 Novel Coronavirus (Covid-19) Situation In Malaysia. In: Ministry of Health Malaysia Official Website. 2020 Feb 5 [Cited 2020 March 26]. Available from:  
[http://www.moh.gov.my/moh/resources/COVID-9/PRESS%20RELEASE/PR\\_5\\_Feb.pdf](http://www.moh.gov.my/moh/resources/COVID-9/PRESS%20RELEASE/PR_5_Feb.pdf)
3. Ministry of Health Malaysia. Press Statement Updates On The Coronavirus Disease 2019 (Covid-19) Situation In Malaysia. In: Ministry of Health Malaysia Official Website. 2020 Feb 28 [Cited 2020 March 26]. Available from:  
<http://www.moh.gov.my/moh/resources/auto%20download%20images/5e58defa7f7f7.pdf>
4. Ministry of Health Malaysia. Press Statement Updates On The Coronavirus Disease 2019 (Covid-19) Situation In Malaysia. In: Ministry of Health Malaysia Official Website. 2020 March 11 [Cited 2020 March 26]. Available from:  
[http://www.moh.gov.my/index.php/database\\_stores/attach\\_download/337/1351](http://www.moh.gov.my/index.php/database_stores/attach_download/337/1351)
5. Rashvinjeet S. Bedi. Health Ministry Detects Five 'Generations' Of Covid-19 Cases Linked to Tabligh Cluster. TheStar. 2020 March 27. [Cited 2020 March 29]. Available from: <https://www.thestar.com.my/news/nation/2020/03/27/health-ministry-detects-five->

039generations039-of-covid-19-cases-linked-to-tabligh-cluster

6. Ministry of Health Malaysia. Press Statement Updates On The Coronavirus Disease 2019 (Covid-19) Situation In Malaysia. In: Ministry of Health Malaysia Official Website. 2020 March 18 [Cited 2020 March 26]. Available from:  
[http://www.moh.gov.my/index.php/database\\_stores/attach\\_download/337/1380](http://www.moh.gov.my/index.php/database_stores/attach_download/337/1380)
7. Mohd Farhaan Shah. Covid-19: 1,000 Housemen to Be Stationed Nationwide To Support Medical Staff. TheStar. 2020 March 14. [Cited 2020 March 29]. Available from:  
<https://www.thestar.com.my/news/nation/2020/03/14/covid-19-1000-housemen-to-be-stationed-nationwide-to-support-medical-staff>
8. Julia Chan. Covid-19: 3,000 Retired Nurses to Return To Service. TheStar. 2020 March 25. [Cited 2020 March 30]. Available from:  
<https://www.malaymail.com/news/malaysia/2020/03/25/covid-19-3000-retired-nurses-to-return-to-service/1850174>
9. Shi P, Cao S, Feng P. SEIR Transmission dynamics model of 2019 nCoV coronavirus with considering the weak infectious ability and changes in latency duration. medRxiv. 2020 Jan 1.
10. Fang Y, Nie Y, Penny M. Transmission dynamics of the COVID-19 outbreak and effectiveness of government interventions: A data-driven analysis. Journal of medical virology. 2020 Mar 6.
11. Peng L, Yang W, Zhang D, Zhuge C, Hong L. Epidemic analysis of COVID-19 in China by dynamical modeling. arXiv preprint arXiv:2002.06563. 2020 Feb 16.
12. Yang Z, Zeng Z, Wang K, Wong SS, Liang W, Zanin M, Liu P, Cao X, Gao Z, Mai Z, Liang J. Modified SEIR and AI prediction of the epidemics trend of COVID-19 in China



- under public health interventions. *Journal of Thoracic Disease*. 2020;12(2).
13. Mamo DK, Koya PR. Mathematical modeling and simulation study of SEIR disease and data fitting of Ebola epidemic spreading in West Africa. *Journal of Multidisciplinary Engineering Science and Technology*. 2015 Jan;2(1):106-14.
  14. Department of Statistics Malaysia
  15. NADMA. Jumlah Individu yang Diuji Untuk COVID-19. 2020 March 17. [Cited 2020 March 30]. Available from:  
<https://www.google.com.my/url?sa=i&url=http%3A%2F%2Fwww.nadma.gov.my%2Fbencana%2Findex.php%2Fcomponent%2Fcontent%2Farticle%2F46-covid-19%2Fsiaran-media%2F656-statistik-jumlah-individu-yang-diuji-untuk-covid-19-di-malaysia-17-03-2020>
  16. Ministry of Health Malaysia. Press Statement Updates on The Coronavirus Disease 2019 (Covid-19) Situation in Malaysia. In: Ministry of Health Malaysia Official Website. 2020 March 28 [Cited 2020 March 31]. Available from:  
[http://www.moh.gov.my/index.php/database\\_stores/attach\\_download/337/1399](http://www.moh.gov.my/index.php/database_stores/attach_download/337/1399)
  17. Ministry of Health Malaysia. Press Statement Updates on The Coronavirus Disease 2019 (Covid-19) Situation In Malaysia. In: Ministry of Health Malaysia Official Website. 2020 March 27 [Cited 2020 March 31]. Available from:  
[http://www.moh.gov.my/index.php/database\\_stores/attach\\_download/337/1398](http://www.moh.gov.my/index.php/database_stores/attach_download/337/1398)
  18. Tang B, Wang X, Li Q, Bragazzi NL, Tang S, Xiao Y, Wu J. Estimation of the transmission risk of the 2019-nCoV and its implication for public health interventions. *Journal of clinical medicine*. 2020 Feb;9(2):462.
  19. Li Q, Guan X, Wu P, Wang X, Zhou L, Tong Y, Ren R, Leung KS, Lau EH, Wong JY,

- Xing X. Early transmission dynamics in Wuhan, China, of novel coronavirus–infected pneumonia. *New England Journal of Medicine*. 2020 Jan 29.
20. World Health Organization (WHO) [cited 2020 March 31]. Available from: [https://www.who.int/news-room/detail/23-01-2020-statement-on-the-meeting-of-the-international-health-regulations-\(2005\)-emergency-committee-regarding-the-outbreak-of-novel-coronavirus-\(2019-ncov\)](https://www.who.int/news-room/detail/23-01-2020-statement-on-the-meeting-of-the-international-health-regulations-(2005)-emergency-committee-regarding-the-outbreak-of-novel-coronavirus-(2019-ncov))
21. Kucharski AJ, Russell TW, Diamond C, Liu Y, Edmunds J, Funk S, Eggo RM, Sun F, Jit M, Munday JD, Davies N. Early dynamics of transmission and control of COVID-19: a mathematical modelling study. *The Lancet Infectious Diseases*. 2020 Mar 11.
22. Kraemer MU, Yang CH, Gutierrez B, Wu CH, Klein B, Pigott DM, du Plessis L, Faria NR, Li R, Hanage WP, Brownstein JS. The effect of human mobility and control measures on the COVID-19 epidemic in China. *Science*. 2020 Mar 25.
23. R software, R-3.6.3 with package “deSolve.
24. New Confirmed Cases. [Cited 2020 March 31]. Available from: [www.outbreak.my](http://www.outbreak.my)
25. Lawrence O. Gostin. What Questions Should Global Health Policy Makers Be Asking About the Novel Coronavirus? *Health Affairs*. [Cited 2020 March 31]. Available from: <https://www.healthaffairs.org/doi/10.1377/hblog20200203.393483/full/>
26. Steven Russolillo, Xie Yu and Stella Yifan Xie. Coronavirus Outbreak Sends Chinese Markets Lower After Holiday Break. *The Wall Street Journal*. [Cited 2020 March 31]. Available from: [https://www.wsj.com/articles/chinese-markets-tumble-on-mounting-coronavirus-fears-11580695672?mod=article\\_inline](https://www.wsj.com/articles/chinese-markets-tumble-on-mounting-coronavirus-fears-11580695672?mod=article_inline).
27. Brooks SK, Webster RK, Smith LE, Woodland L, Wessely S, Greenberg N, Rubin GJ. The psychological impact of quarantine and how to reduce it: rapid review of the

- evidence. *The Lancet*. 2020 Feb 26.
28. Sprang G, Silman M. Posttraumatic stress disorder in parents and youth after health-related disasters. *Disaster medicine and public health preparedness*. 2013 Feb;7(1):105-10.
29. Matsuishi K, Kawazoe A, Imai H, Ito A, Mouri K, Kitamura N, Miyake K, Mino K, Isobe M, Takamiya S, Hitokoto H. Psychological impact of the pandemic (H1N1) 2009 on general hospital workers in Kobe. *Psychiatry and clinical neurosciences*. 2012 Jun;66(4):353-60.
30. Wu P, Fang Y, Guan Z, Fan B, Kong J, Yao Z, Liu X, Fuller CJ, Susser E, Lu J, Hoven CW. The psychological impact of the SARS epidemic on hospital employees in China: exposure, risk perception, and altruistic acceptance of risk. *The Canadian Journal of Psychiatry*. 2009 May;54(5):302-11.
31. Chan KL, Chau WW, Kuriansky J, Dow E, Zinsou JC, Leung J, Kim S. The psychosocial and interpersonal impact of the SARS epidemic on Chinese health professionals: Implications for epidemics, including Ebola. *The Psychosocial Aspects of a Deadly Epidemic: What Ebola Has Taught Us About Holistic Healing*.. 2016 Mar 21:287.
